# Supplementary material for: Look beyond the Mirror: Laparoscopic Cholecystectomy in Situs Inversus Totalis—A Systematic Review and Meta-Analysis (and Report of New Technique)
Source: MDPI journal article supplement (doi:10.3390/diagnostics12051265), 2022-05-19
Supplement: s1 [file s1]

Table S1: Summary of included cases and reports.

| YEAR | AUTHORS                                                                                         | SEX | AGE | DISEASE | DOM. HAND | OP. TECH |
|------|-------------------------------------------------------------------------------------------------|-----|-----|---------|-----------|----------|
| 1991 | CAMPOS, L., SIPES, E.                                                                           | F   | 39  | AC      | R         | MIRA     |
| 1992 | P. GOH, Y. TEKANT, NS SHANG, SS<br>NGOI                                                         | M   | 62  | AC      |           | MIRA     |
| 1992 | SM HUANG, GY CHAU, WY LUI                                                                       | M   | 36  | CC      |           | MIRA     |
| 1992 | H. THOMAS TAKEL, J. GARY<br>MAXWELL, THOMAS V. CLANCY,<br>AND ELLIS A. TINSLEY                  | F   | 51  | CC      |           | MIRA     |
| 1993 | J. P. MCDERMOTT, P. F. CAUSHAJ                                                                  | M   | 66  | CHO     |           | MIRA     |
| 1996 | MALATANI, T.S.                                                                                  | F   | 25  | CC      |           | MIRA     |
| 1997 | HABIB, Z., SHANAFEY, S.,<br>ARVIDSSON, S.                                                       | F   | 45  | CC      |           | MIRA     |
| 1999 | H. DEMETRIADES D. BOTSIOSA C.<br>DERVENIS J. EVAGELOUA S.<br>AGELOPOULOS J. DADOUKIS            | F   | 61  | AC      | R         | MIRA     |
| 1999 | H. DEMETRIADES D. BOTSIOSA C.<br>DERVENIS J. EVAGELOUA S.<br>AGELOPOULOS J. DADOUKIS            | M   | 37  | CC      | R         | MIRA     |
| 2000 | KOMBOROZOS, V., PAPOUDOS, M.,<br>YANNOPOULOS, P.                                                | M   | 61  | AC      | L         | MIRA     |
| 2001 | RAMI J. YAGHAN, FRCS, KAMAL I.<br>GHARAIBEH, FRCS, SAHEL<br>HAMMORI, M.D.2                      | F   | 48  | CC      | R         | MIRA     |
| 2001 | RAMI J. YAGHAN, FRCS, KAMAL I.<br>GHARAIBEH, FRCS, SAHEL<br>HAMMORI, M.D.2                      | F   | 38  | AC      | R         | MIRA     |
| 2001 | M. AL-JUMAILY, FRCS (ED), M.<br>ACHAB, DIS, AND F. HOCHÉ, CES                                   | F   | 46  | AC      |           |          |
| 2001 | RAMAMURTHY DONTI, MD,<br>DAVID J. THOMAS, [...], AND STEVEN<br>P. SCHMIDT, PHD                  | F   | 43  | CC      |           | MIRA     |
| 2001 | TARIK ZAFER NURSAL, M.D.,1 ATAÇ<br>BAYKAL, M.D.,2 DÜZGÜN İRET, M.D.,<br>2, AND ÖMER ARAN, M.D.2 | F   | 42  | CC      | R         | MIRA     |
| 2002 | HONDA, M., TAKESUE, F., YASUDA,<br>M., INUTSUKA, S., NOZOE, T.,<br>KORENAGA, D.                 | M   | 49  | CC      | R         | MIRA     |
| 2002 | A. POLYCHRONIDIS, A.<br>KARAYIANNAKIS, S. BOTAITIS, S.<br>PERENTE, AND C. SIMOPOULOS            | M   | 68  | CC      |           | MIRA     |
| 2003 | LM OMS, JM BADIA                                                                                | F   | 70  | CC      | R         | MIRF     |
| 2003 | LM OMS, JM BADIA                                                                                | M   | 65  | AC      | L         | MIRF     |
| 2003 | CAPOV, I., BODO, F., WECHSLER, J.,<br>ROVNÁK, J.                                                | F   | 51  | AC      | R         | MIRA     |
| 2003 | CAPOV, I., BODO, F., WECHSLER, J.,<br>ROVNÁK, J.                                                | F   | 53  | AC      | R         | MIRA     |

|      |                                                                                                              |   |    |         |   |      |
|------|--------------------------------------------------------------------------------------------------------------|---|----|---------|---|------|
| 2004 | SUNG-BUM KANG, MD AND HO-SEONG HAN, MD                                                                       | F | 64 | AC, CHL |   | MIRA |
| 2005 | SUMIHIRO KAMITANI, YOSIHIRO TSUTAMOTO, KAZUYOSHI HANASAWA, TOHRU TANI                                        | M | 76 | CC      |   | MIRA |
| 2005 | ERKAN, N., AGDENIZ, S., POLAT, A.F., AKSOZ, K., YILMAZ, C., YILDIRIM, M., UNSAL, B.                          | F | 41 | CC      | R | MIRA |
| 2005 | ERKAN, N., AGDENIZ, S., POLAT, A.F., AKSOZ, K., YILMAZ, C., YILDIRIM, M., UNSAL, B.                          | M | 37 | AC, CHL | R | MIRA |
| 2005 | M. PITIAKOUDIS, A. K. TSAROUCHAS, M. KATOTOMICHELAKIS, A. POLYCHRONIDIS & C. SIMOPOULOS                      | F | 47 | CC      |   | MIRA |
| 2005 | DAMIAN MCKAY* AND GEOFFREY BLAKE                                                                             | F | 32 | CC      | R | MIRA |
| 2006 | UNAL AYDIN, OMER UNALP, PINAR YAZICI, BARIS GURCU, MURAT SOZBILEN, AHMET COKER                               | M | 35 | CC      | R |      |
| 2006 | NORMAN ONEIL MACHADO, MS, FRCS, PRADDEEP CHOPRA, MS, FRCS                                                    | F | 65 | CC      | R | MIRA |
| 2006 | BORIS KIRSHTEN, MD,* SOFIE LANTSBERG, MD,W SOLLER MIZRAHI, MD, FACS,* AND LEONID LANTSBERG, MD*              | F | 51 | AC      | R | MIRF |
| 2006 | AY SHAH, BC PATEL, BA PANCHAL                                                                                | F | 60 | CC      | R | MIRA |
| 2007 | SENTHIL KUMAR, GIUSEPPE FUSAI                                                                                | F | 57 | CC      | R | MIRA |
| 2007 | JAMAL HAMDANI, OMAR ABU HAMDAN                                                                               | M | 41 | CA      | R | MIRA |
| 2008 | THEODOROS E. PAVLIDIS, KYRIAKOS PSARRAS, APOSTOLOS TRIANTAFYLLOU, GEORGIOS N. MARAKIS                        | F | 34 | AC      | R | MIRA |
| 2008 | MAURO NEIVA FERNANDES, IVAN NAZARENO CAMPOS NEIVA, FRANCISCO DE ASSIS CAMACHO, LUCAS CROCIATI MEGUINS        | F | 43 | CC      | L | MIRA |
| 2009 | VELIMEZIS G, ANTONIADES J, FRAGGEDAKIS G, SISAMAKIS G                                                        | F | 66 | CC      | R | MIRA |
| 2009 | SIMMONS, JON D; MAXWELL, ERICA, MD; VICK, KENNETH D, MD.                                                     | F | 18 | CC      | R | MIRA |
| 2009 | EISENBERG DAN                                                                                                | M | 61 | CC      | R | MIRA |
| 2010 | VIKAS JINDAL, MS, DNB,1 MAHESH C. MISRA, MS, FRCS, FACS,1 VIRINDER K. BANSAL, MS, ASURI KRISHNA, MS,1 RAJESH | F | 55 | AP, AC  | R | MIRA |

|      |                                                                                                                                                               |   |    |         |   |      |
|------|---------------------------------------------------------------------------------------------------------------------------------------------------------------|---|----|---------|---|------|
|      | PANWAR, MS,1 AND VIMI REWARI,<br>MD2                                                                                                                          |   |    |         |   |      |
| 2010 | VIKAS JINDAL, MS, DNB,1 MAHESH<br>C. MISRA, MS, FRCS, FACS,1<br>VIRINDER K. BANSAL, MS,<br>ASURI KRISHNA, MS,1 RAJESH<br>PANWAR, MS,1 AND VIMI REWARI,<br>MD2 | F | 26 | AC      | R | MIRA |
| 2010 | PATLE, N.M., TANTIA, O., SASMAL,<br>P.K., KHANNA, S., SEN, B.                                                                                                 | F | 36 | CC      | R | MIRA |
| 2010 | PATLE, N.M., TANTIA, O., SASMAL,<br>P.K., KHANNA, S., SEN, B.                                                                                                 | F | 43 | CC      | R | MIRA |
| 2010 | PATLE, N.M., TANTIA, O., SASMAL,<br>P.K., KHANNA, S., SEN, B.                                                                                                 | F | 27 | CC      | R | MIRA |
| 2010 | PATLE, N.M., TANTIA, O., SASMAL,<br>P.K., KHANNA, S., SEN, B.                                                                                                 | M | 48 | CC      | R | MIRA |
| 2010 | PATLE, N.M., TANTIA, O., SASMAL,<br>P.K., KHANNA, S., SEN, B.                                                                                                 | F | 59 | AC      | R | MIRA |
| 2010 | PATLE, N.M., TANTIA, O., SASMAL,<br>P.K., KHANNA, S., SEN, B.                                                                                                 | F | 33 | CC      | R | MIRA |
| 2010 | TC HALL, J BARANDIARAN, EP<br>PERRY                                                                                                                           | M | 53 | CC      | R | MIRA |
| 2011 | PAPAZIOGAS, B., KOUTELIDAKIS, I.,<br>TSIAOUSIS, P., PARASKEVAS, G.,<br>CHATZIMAVROUDIS, G.,<br>ATMATZIDIS, S.                                                 | F | 55 | CC      | R | MIRA |
| 2011 | TOPUZ, O., SOZEN, S., AGACHAN,<br>A.F., TUKENMEZ, M., VURDEM, U.E.                                                                                            | M | 50 | CC      | R | MIRA |
| 2011 | EVOLI, LP; MIGLIONICO, L;<br>GRAZIOSI, L; CAVAZZONI, E;<br>BUGIANTELLA, W; DEI SANTI, V;<br>DONINI, A                                                         | F | 48 | AC      | L | MIRA |
| 2011 | MEHMET ULUDAG, MD, GURKAN<br>YETKIN, MD, ABDULCABBAR<br>KARTAL, MD                                                                                            | M | 49 | CC      | R | SP   |
| 2011 | MUSTAFA OZSOY, 1 MEHMET FATIH<br>HASKARACA, 1 ALIHAN<br>TERZIOGLU 2                                                                                           | F | 65 | AC      | R | SP   |
| 2011 | HYUNG JOON HAN1 , SAE BYEOL<br>CHOI1 , CHUNG YUN KIM2 , WAN<br>BAE KIM1 , TAE JIN SONG                                                                        | M | 45 | CC      | R | SP   |
| 2012 | HARVINDER SINGH PAHWA,<br>AWANISH KUMAR, ROHIT<br>SRIVASTAVA                                                                                                  | F | 46 | CC      | R | MIRA |
| 2012 | DEMIRYILMAZ, I., YILMAZ, I.,<br>ALBAYRAK, Y., PEKER, K., SAHIN, A.,<br>SEKBAN, N.                                                                             | F | 55 | CC      | R | MIRA |
| 2012 | DEMIRYILMAZ, I., YILMAZ, I.,<br>ALBAYRAK, Y., PEKER, K., SAHIN, A.,<br>SEKBAN, N.                                                                             | F | 51 | AC, CHL | R | MIRA |
| 2012 | ELBESHRY, T.M., GHNNAM, W.M.                                                                                                                                  | F | 24 | CC      | R | MIRA |

|      |                                                                                                                                 |   |    |         |   |      |
|------|---------------------------------------------------------------------------------------------------------------------------------|---|----|---------|---|------|
| 2012 | LOCHMAN, P., HOFFMANN, P.,<br>KOČÍ, J.                                                                                          | F | 75 | AC      | R | MIRA |
| 2012 | BOZKURT S, COSKUN H, ATAK T, ET<br>AL.                                                                                          | M | 49 | CC      |   | SP   |
| 2012 | MARCUS VINICIUS DANTAS DE<br>CAMPOS MARTINS <sup>1,2*</sup> , JOSÉ LUIS<br>PANTALEÃO FALCÃO <sup>1,2</sup> , JAMES<br>SKINOVSKY | F | 59 | CC      |   | SP   |
| 2012 | D.R. IUSCO, S. SACCO, I. ISMAIL, S.<br>BONOMI, S. VIRZÌ                                                                         | F | 52 | CC      | R | MIRF |
| 2013 | ARYA, S.V., DAS, A., SINGH, S.,<br>KALWANIYA, D.S., SHARMA, A.,<br>THUKRAL, B.B.                                                | F | 35 | CC      | R | MIRA |
| 2013 | MOHAMMED SULAIMAN ALI, SAAD<br>MUWAFQA ATTASH                                                                                   | F | 43 | CC      | R |      |
| 2013 | STOJCEV, Z., DUSZEWSKI, M.,<br>BOBOWICZ, M., GALLA, W.,<br>MALISZEWSKI, D.                                                      | M | 47 | AC      | R | MIRA |
| 2013 | SHENG-NING ZHANG*, LI LI, JIANG-<br>HUA RAN, JING LIU, YU LIANG,<br>YANG GAO, AND MIN-JIE YANG                                  | F | 50 | CC      | R | MIRA |
| 2013 | ELBERT KHIANGTE <sup>1</sup> , IHEULE<br>NEWME <sup>2</sup> , KARABI PATOWARY <sup>3</sup> ,<br>PARTHA PHUKAN <sup>4</sup>      | M | 65 | CC      | R | SP   |
| 2014 | REDDY, A., PARAMASIVAM, S.,<br>ALEXANDER, N., ABHILASH,<br>RAVISANKAR, V., THILLAI, M.                                          | F | 45 | AC, CHL | R | MIRA |
| 2014 | BUTT, M.Q., CHATHA, S.S.,<br>GHUMMAN, A.Q., RASHEED, A.,<br>FAROOQ, M., AHMED, J.                                               | F | 42 | CC      |   | MIRA |
| 2014 | MOIRANGTHEM, G.S., SINGH, C.A.,<br>CHAKRABORTY, G., LOKENDRA, K.,<br>PRABHU, T.                                                 | F | 50 | CC      | R | MIRA |
| 2014 | RAGHUVVEER M N, MAHESH SHETTY<br>S, SUNIL KUMAR B B                                                                             | M | 55 | CC      | R | MIRA |
| 2015 | NATTHAWUT PHOTHONG<br>THAWATCHAI AKARAVIPUTH<br>VITON CHINSWANGWATANAKUL<br>AND ATTHAPHORN<br>TRAKARNSANGA                      | F | 39 | CC      | R | MIRA |
| 2015 | EL-SAADY, AM                                                                                                                    | F | 52 | CC      | R | MIRA |
| 2015 | YOSHIO DEGUCHI, KEITARO<br>MITAMURA, SHUNSUKE OMOTAKA,<br>JUN-ICHI EGUCHI, DAI SAKUMA,<br>MASASHI SATO                          | M | 66 | CC      | R | SP   |
| 2015 | SHEIKH SAYIDUL HAQUE, SYED AL<br>FESUNY, MD. BELALUDDIN, S. M.<br>SAKIB KABIR, MEER ISHRAT JAHAN                                | F | 27 | CC      | R | MIRA |
| 2016 | ALSABEK, M.B., ARAFAT, S.,<br>ALDIRANI, A.                                                                                      | F | 50 | CC      | L | MIRA |

|      |                                                                                                              |   |    |         |      |      |
|------|--------------------------------------------------------------------------------------------------------------|---|----|---------|------|------|
| 2016 | DUNCAN, T.K., WAXMAN, K.                                                                                     | F | 42 | AC, CHL | AMBI | MIRA |
| 2016 | AHMED, Z., KHAN, S.A., CHHABRA, S., YADAV, R., KUMAR, N., VIJ, V., SAXENA, D., TALERA, D.                    | F | 46 | AC      | R    | MIRA |
| 2016 | AHMED, Z., KHAN, S.A., CHHABRA, S., YADAV, R., KUMAR, N., VIJ, V., SAXENA, D., TALERA, D.                    | F | 44 | CC      | R    | MIRA |
| 2016 | AHMED, Z., KHAN, S.A., CHHABRA, S., YADAV, R., KUMAR, N., VIJ, V., SAXENA, D., TALERA, D.                    | F | 33 | CC      | R    | MIRA |
| 2016 | FLEUR BERBERS, SUZANNE VAN LEUVEN, TON K.C.A. VAN ENGELENBURG, RICHARD P.G. TEN BROEK                        | M | 44 | AC      |      | MIRA |
| 2016 | ROBIN BOTHRA ,AKHILESH SHEKHAWAT                                                                             | F | 45 | AC      | R    | MIRA |
| 2016 | ROBERTO MARCELLUS DE BARROS SENA, MARCELO BARROS WEISS, ANA PAULA TEIXEIRA DE ABREU,                         | F | 16 | AC      |      | MIRA |
| 2016 | SARDAR ARIF                                                                                                  | F | 42 | AC      | L    | MIRA |
| 2017 | NARONGSAK RUNGSAKULKIJ AND PONGSATORN TANGTAWE                                                               | M | 32 | CC      | R    | MIRA |
| 2017 | JIAN-JUN REN SHU-DONG LI YA-JUN GENG AND RUI XIAO                                                            | F | 36 | CC      | R    | MIRA |
| 2017 | FANSHAWE, AEE; QURASHI, K                                                                                    | F | 53 | AP      | R    | MIRF |
| 2017 | ANIS HADDAD*, AMINE SEBAL, SOUHAIB ATRI, AMINE DAGHFOUS AND ZOUBEIR BEN SAFTA                                | M | 58 | AC      | R    | MIRF |
| 2017 | ANIS HADDAD*, AMINE SEBAL, SOUHAIB ATRI, AMINE DAGHFOUS AND ZOUBEIR BEN SAFTA                                | M | 54 | AC      | R    | MIRF |
| 2017 | RAHEEL AHMAD, MUHAMMAD S. SHAFIQUE*, SHEIKH H. AHMAD, SAQIB MEHMOOD, JAHANGIR S. KHAN                        | F | 57 | AP      |      | MIRA |
| 2017 | AZHAR ALAM, AND ABHIJIT SANTRA                                                                               | F | 20 | CC      | R    | MIRA |
| 2017 | DEBORAH MARQUES CENTENO1, TIAGO GALAN DE FRANÇA1, ACÁCIO AUGUSTO CENTENO NETO                                | F | 16 | AC      | R    | MIRF |
| 2017 | MEHMET TOLGA KAFADAR, , METIN YALCIN, , YILDIRAY DADUK, , MURAT SOYALP, , MEHMET ALI GOK                     | F | 59 | AC      | R    | MIRA |
| 2017 | MEHMET GÖKÇEIMAM, BURAK GÜNEY, EMIN KÖSE, DENİZ TAZE OĞLU, MEHMET CAN AYDIN, KADIR MEKE, SERVET RÜŞTÜ KARAHA | F | 39 | AC      | R    | MIRA |
| 2018 | TAKALKAR, Y.P., KORANNE, M.S., VASHIST, K.S., KHEDEKAR, P.G.,                                                | F | 50 | AC, CHL | AMBI | MIRA |

|      |                                                                                                                      |   |    |         |    |      |
|------|----------------------------------------------------------------------------------------------------------------------|---|----|---------|----|------|
|      | GARALE, M.N., REGE, S.A., DALVI, A.N.                                                                                |   |    |         |    |      |
| 2018 | RAJINDER SINGH JHOBTA, ARCHIT GUPTA, BALWANT NEGI, KAPIL NEGI                                                        | F | 23 | CC      | R  | SP   |
| 2018 | GULZAR AHMAD BHAT* AND DEEPAK GHULLIANI                                                                              | M | 21 | CC      | R  | MIRA |
| 2018 | JAE YOOL JANG, M.D., WOOHYUNG LEE, M.D., JINKYU CHO, M.D., CHI-YEONG JEONG, M.D., PH.D., SOON-CHAN HONG, M.D., PH.D. | M | 63 | CC      | R  | MIRA |
| 2018 | JAE YOOL JANG, M.D., WOOHYUNG LEE, M.D., JINKYU CHO, M.D., CHI-YEONG JEONG, M.D., PH.D., SOON-CHAN HONG, M.D., PH.D. | F | 57 | AC      | R  | MIRA |
| 2019 | ALKHLAIWY, O., ALMUHSIN, A.M., ZAKARNEH, E., TAHA, M.Y.                                                              | M | 40 | CC      | R  | MIRA |
| 2019 | MOHAMED ALI CHAOUCH, HICHEM JERRAYA, MOHAMED WEJIH DOUGAZ, RAMZI NOUIRA & CHADLI DZIRI                               | F | 48 |         | R  | MIRF |
| 2019 | MOHAMED ALI CHAOUCH, HICHEM JERRAYA, MOHAMED WEJIH DOUGAZ, RAMZI NOUIRA & CHADLI DZIRI                               | M | 88 |         | R  | MIRF |
| 2019 | FALAK SHER MALIK, USMAN ISMAT BUTT, WASIM HAYAT KHAN <sup>2</sup> , SYED MUHAMMAD BILAL <sup>2</sup>                 | F | 40 | CC      | R  | MIRA |
| 2019 | LIANGSHUO HU, MD, YICHAO CHAI, MD, XUE YANG, ZHENG WU, HAO SUN, ZHENG WANG                                           | M | 72 | AP      | R  | MIRA |
| 2019 | EUN JEONG JANG, M.D., YOUNG HOON ROH, M.D., PH.D                                                                     | M | 37 | CC      | R  | SP   |
| 2019 | AYAD AHMAD MOHAMMED, SARDAR HASSAN ARIF                                                                              | M | 28 | CC      | RL | MIRA |
| 2019 | BHUPANDER KUMAR CHAWLA, ADITYA CHAWLA                                                                                | F | 30 | CC      | R  | MIRA |
| 2020 | MOYON C, M.A., ROJAS, C.L., MOYON C, F.X., AGUAYO, W.G., MOLINA, G.A., OCHOA, C., NEIRA, A.                          | M | 55 | AC      | R  | MIRA |
| 2020 | TIANLI DU, ABDELKADER HAWASLI, KAREN SUMME, AHMED A. MEGUID, CHRISTOPHER LAI, MOUTAMN SADOUN                         | F | 56 | AC      | R  | MIRA |
| 2020 | BRAÑES, A., PÉREZ, G.                                                                                                | F | 79 | AC, CHL | R  | MIRF |
| 2020 | FERNANDO PONCE LEON, MARIANA H. FIORENCIO, CAMILLA P. LEAL, ANDRÉ R. SANTOS                                          | F | 61 | CC      | R  | MIRA |
| 2020 | PALOMBA, G., DINUZZI, V.P., MANIGRASSO, M., MILONE, M., DE PALMA, G.D. AND APREA, G                                  | F | 24 | CC      | L  | MIRA |

|      |                                                                                    |   |    |         |   |      |
|------|------------------------------------------------------------------------------------|---|----|---------|---|------|
| 2021 | GELEVSKI, R., JOTA, G., TODOROVIĆ, L., TRAJKOVSKI, G., JOKSIMOVIĆ, V., TRENČIĆ, B. | F | 61 | CC      | R | MIRA |
| 2021 | ALIAS, J., ARSHAD, A.W.M., MOHAMAD, I.S., MENG, L.V.                               | F | 58 | CC, CHL | R | MIRA |
| 2021 | SIMKHADA, S., MALLA, B., SHRESTHA, R.                                              | M | 54 | CC      | R | MIRA |
| 2021 | SIMKHADA, S., MALLA, B., SHRESTHA, R.                                              | F | 63 | CC, CHL | R | MIRF |
| 2021 | TIRELLI F, GRIECO M, BIONDI A, BELIA F, PERSIANI R                                 | F | 29 | CC      | R |      |
| 2021 | HERRERA ORTIZ A, LACOUTURE J C, SANDOVAL MEDINA D, ET AL                           | F | 46 | AC      | R | MIRA |
| 2021 | TAVASSOLI, A., ZANDBAF, T. AND REZAPANAH, A                                        | F | 52 | CC      | R |      |
| 2021 | TAVASSOLI, A., ZANDBAF, T. AND REZAPANAH, A                                        | F | 64 | CC      | R |      |
| 2021 | RANJAN R, SAHU KK, PRASAD VS                                                       | F | 24 | CC      | R | MIRA |
| 2022 | PRESENT CASE REPORT                                                                | F | 38 | CC      | R | MIRA |
